# Supplementary material for: A Proinflammatory Immune Response Might Determine Toxoplasma gondii Vertical Transmission and Severity of Clinical Features in Congenitally Infected Newborns
Source: PubMed Central journal article supplement (PMC7082359; doi:10.3389/fimmu.2020.00390), 2020-03-13
Supplement: Table_1.pdf [file Table_1.pdf]

Supplementary Table 1. Serological and clinical data of *T. gondii* infected women

| Case number | Age (years) | GWD | IgG avidity | WB IgM | WB IgG | Congenital Transmission | Current pregnancy problems       | History of obstetric problems                                 |
|-------------|-------------|-----|-------------|--------|--------|-------------------------|----------------------------------|---------------------------------------------------------------|
| 1*          | 33          | 30  | Gray zone   | +      | +      | no                      | -                                | -                                                             |
| 2*          | 21          | 12  | Gray zone   | +      | +      | no                      | -                                | Miscarriage                                                   |
| 3           | 39          | 34  | High        | +      | +      | no                      | -                                | Miscarriage                                                   |
| 4*          | 29          | 12  | Low         | -      | +      | no                      | -                                | Moebius                                                       |
| 5           | 36          | 28  | High        | +      | -      | no                      | Polihydroamnios                  | Miscarriage                                                   |
| 6           | 29          | 13  | High        | +      | +      | no                      | Obesity                          | -                                                             |
| 7*          | 36          | 7   | Low         | -      | +      | no                      | -                                | -                                                             |
| Mean        | 32          | 19  |             | 5/7    | 6/7    |                         |                                  |                                                               |
| Median      | 33          | 13  |             |        |        |                         |                                  |                                                               |
| 1           | 21          | 38  | High        | +      | +      | yes                     | hydrocephalus<br>oligohydramnios | -                                                             |
| 2^          | 21          | 37  | Low         | -      | -      | yes                     | -                                | Preeclampsia                                                  |
| 3^          | 17          | 39  | Gray zone   | +      | +      | yes                     | -                                | -                                                             |
| 4*          | -           | 26  | Low         | +      | +      | yes                     | -                                | Hydrops fetalis                                               |
| 5           | 33          | 15  | High        | +      | +      | yes                     | -                                | -                                                             |
| 6^          | 27          | 40  | Low         | -      | +      | yes                     | -                                | -                                                             |
| 7*^         | 38          | 12  | Low         | +      | +      | yes                     | -                                | Miscarriage, and<br>other baby with<br>heart<br>malformations |
| 8           | 20          | 40  | High        | +      | +      | yes                     | Oligohydramnios                  | -                                                             |
| 9*          | 32          | 12  | Low         | -      | +      | yes                     | -                                | Preeclampsia                                                  |
| 10          | 21          | 20  | nd          | +      | -      | yes                     | Chorionic hematoma               | -                                                             |
| Mean        | 26          | 28  |             | 7/10   | 7/10   |                         |                                  |                                                               |
| Median      | 21          | 32  |             |        |        |                         |                                  |                                                               |

GWD, gestational week at diagnosis. \*Cases from Gómez-Chávez, et. al. 2019. ^Cases confirmed by PCR in blood.
