# Supplementary material for: A Proinflammatory Immune Response Might Determine Toxoplasma gondii Vertical Transmission and Severity of Clinical Features in Congenitally Infected Newborns
Source: PubMed Central journal article supplement (PMC7082359; doi:10.3389/fimmu.2020.00390), 2020-03-13
Supplement: Table_2.pdf [file Table_2.pdf]

Supplementary Table 2. Serological and clinical data of *T. gondii* congenitally infected newborns

| Case number | Gómez-Toscano et al., 2018 case number | Birth weight | Age at diagnosis (days) | WB IgM | WB IgG neoAbs | Blood PCR | Severity        | Localization |
|-------------|----------------------------------------|--------------|-------------------------|--------|---------------|-----------|-----------------|--------------|
| 1           | 2                                      | 3080         | 0                       | +      | +             | +         | Mild            | Local        |
| 2           | 8                                      | 3530         | 27                      | —      | +             | +         | Mild            | Local        |
| 3           | 1                                      | 2838         | 0                       | +      | +             | —         | Mild            | Local        |
| 4           | 9                                      | 3180         | 10                      | +      | —             | +         | Mild            | Local        |
| 5           | 6                                      | 2450         | 3                       | +      | +             | —         | Mild            | Disseminated |
| 6           | 11                                     | 2840         | 0                       | —      | +             | +         | Moderate/Severe | Disseminated |
| 7           | 19                                     | 3000         | 65                      | —      | +             | +         | Moderate/Severe | Disseminated |
| 8           | 18                                     | 1945         | 28                      | —      | +             | +         | Moderate/Severe | Disseminated |
| 9           | na                                     | -            | 0                       | +      | +             | +         | Moderate/Severe | Disseminated |
| 10          | 7                                      | 1615         | 26                      | +      | +             | +         | Moderate/Severe | Disseminated |
| 11          | 10                                     | 1383         | 4                       | +      | +             | —         | Moderate/Severe | Disseminated |
